# Supplementary material for: Food odors trigger Drosophila males to deposit a pheromone that guides aggregation and female oviposition decisions
Source: eLife. 2015 Sep 30;4:e08688. doi: 10.7554/eLife.08688 (PMC4621432; doi:10.7554/eLife.08688)
Supplement: Figure 1—source data 1. — DOI: http://dx.doi.org/10.7554/eLife.08688.004 [file elife08688s001.xlsx]

## Sheet: Sheet1
Figure 1-Source data
	Figure 1C:	Figure 1D:	Figure 1E:
	0.4372	0.0836	0.0647
	0.5167	0.0984	0.2848
	0.5815	0.1713	-0.1142
	0.5437		0.1314
			0.2672
			0.1682
Average	0.5197	0.117767	0.133683
SD	0.0611	0.0469481	0.147013
SE	0.0306	0.0332023	0.0600054
Figure 1I:
	Mixed as secretor and mixed as detector	female as secretor and mixed as detector	male as secretor and mixed as detector
	0.43	0.0761	0.2964
	0.25	0.0126	0.3448
	0.42	0.056	0.2101
	0.28		0.4121
Average	0.345	0.048	0.316
SD	0.0932738	0.0324	0.085
SE	0.0466369	0.0187	0.042
