# Supplementary material for: Food odors trigger Drosophila males to deposit a pheromone that guides aggregation and female oviposition decisions
Source: eLife. 2015 Sep 30;4:e08688. doi: 10.7554/eLife.08688 (PMC4621432; doi:10.7554/eLife.08688)
Supplement: Figure 2—source data 1. — DOI: http://dx.doi.org/10.7554/eLife.08688.016 [file elife08688s002.xlsx]

## Sheet: Sheet1
Figure 2-Source data
	Figure 2B
	WT	poxn mutant	ppk23 mutant
	0.4372	0.2486	0.275
	0.5167	0.4931	0.3309
	0.5815	0.5662	0.5156
	0.5437	0.3532	0.4574
Average	0.5197	0.415275	0.394725
SD	0.0611	0.141973	0.110975
SE	0.0306	0.0709865	0.0554877
	Figure 2C
	WT as secretor and WT as detector	WT as secretor and Ir8a-;Ir25- as detector	WT as secretor and orco- as detector	WT as secretor and Ir8a-;;orco- as detector
	0.43	0.5815	-0.3489	0.04
	0.25	0.3667	-0.2735	0.1
	0.42	0.4958	-0.2342	0.0406
	0.28	0.3813	-0.2192
Average	0.345	0.456325	-0.26895	0.0602
SD	0.0932738	0.10147	0.0580096	0.0345
SE	0.0538532	0.0585854	0.0334928	0.0199
