# Supplementary material for: Food odors trigger Drosophila males to deposit a pheromone that guides aggregation and female oviposition decisions
Source: eLife. 2015 Sep 30;4:e08688. doi: 10.7554/eLife.08688 (PMC4621432; doi:10.7554/eLife.08688)
Supplement: Figure 3—source data 1. — DOI: http://dx.doi.org/10.7554/eLife.08688.022 [file elife08688s003.xlsx]

## Sheet: Sheet1
Figure 3-Source data
	Figure 3E
	1000x diluted 9-T	10,000 diluted 9-T	100,000 diluted 9-T
	0.3779	0.1746	-0.1041
	0.6576	0.1471	-0.055
	0.4138	0.2335	0.032
	0.4185		0.1191
			0.0462
Average	0.467	0.185	0.00764
SD	0.1283	0.0441	0.0879
SE	0.0641	0.0254	0.0393
