# Supplementary material for: Food odors trigger Drosophila males to deposit a pheromone that guides aggregation and female oviposition decisions
Source: eLife. 2015 Sep 30;4:e08688. doi: 10.7554/eLife.08688 (PMC4621432; doi:10.7554/eLife.08688)
Supplement: Figure 4—source data 1. — DOI: http://dx.doi.org/10.7554/eLife.08688.029 [file elife08688s004.xlsx]

## Sheet: Sheet1
Figure 4-Source data
Figure 4B
Male orco mutant
Dec302013	minearl oil	9-T0.1%	9-T1%	9-T10%	9-T100%
orcomutMale1	0.15	0.12	0.15	0.13	0.13
orcomutMale2	0.2	0.2	0.25	0.2	0.2
orcomutMale3	0.1	0.1	0.13	0.08	0.1
orcomutMale4	0.15	0.15	0.1	0.2	0.18
orcomutMale5	0.1	0.1	0.1	0.1	0.1
Female orco mutant
Dec282013	minearl oil	9-T0.1%	9-T1%	9-T10%	9-T100%
orcomutF1	0.15	0.1	0.1	0.11	0.15
orcomutF2	0.13	0.07	0.1	0.1	0.1
orcomutF3	0.1	0.15	0.18	0.14	0.13
orcomutF4	0.1	0.11	0.2	0.12	0.18
orcomutF6	0.18	0.07	0.08	0.07	0.12
Male wild type
Dec302013+Dec312013	minearl oil	9-T0.1%	9-T1%	9-T10%	9-T100%
IsoD1W-M1	0.3	0.3	0.35	0.5	1.2
IsoD1W-M2	0.2	0.3	0.35	0.6	1.25
IsoD1W-M3	0.25	0.38	0.33	0.6	1.22
IsoD1W-M4	0.2	0.25	0.3	0.57	1.25
IsoD1W-M5	0.25	0.25	0.3	0.5	1.1
IsoD1W-M6:Dec3113	0.2	0.2	0.3	0.45	1.1
Female wild type
Dec302013+Dec312013	minearl oil	9-T0.1%	9-T1%	9-T10%	9-T100%
IsoD1W-F1(7DO)	0.35	0.38	0.45	0.8	1.5
IsoD1W-F2(7DO)	0.25	0.3	0.35	0.65	1.3
IsoD1W-F3(7DO)	0.25	0.25	0.33	0.65	1.2
IsoD1W-F4(7DO)	0.3	0.35	0.4	0.7	1.25
IsoD1W-F5(7DO)	0.25	0.3	0.35	0.6	1.25
IsoD1W-F6(8DO)	0.25	0.26	0.35	0.55	1.2
Figure 4C
ab1 sensillum
		minearl oil	1%9-T	10%9-T	100%9-T
F1S1:111513	A	1	1	0	7
	B	8	-2	10	17
	C	4	5	3	6
	D	-14	-13	-10	-9
F1S2:111513	A	4	3	4	0
	B	2	-2	4	-2
	C	14	12	10	16
	D	-4	-3	-4	-4
F1S1:112813	A	3	2	-3	-2
	B	2	1	2	3
	C	2	1	0	2
	D	0	0	2	1
F1S2:112813	A	3	2	3	3
	B	3	6	3	2
	C	2	2	4	1
	D	3	3	2	4
ab2 sensillum
		minearl oil	1%9-T	10%9-T	100%9-T
F1S1:111513	A	13	4	13	18
	B	3	5	9	4
F1S2:111513	A	18	25	17	26
	B	15	11	10	9
F1S1:120113	A	6	7	4	12
	B	-1	1	-1	5
F1S2:120113	A	11	9	16	21
	B	0	2	8	3
ab3 sensillum
		minearl oil	1%9-T	10%9-T	100%9-T
F1S1:111513	A	28	24	20	38
	B	10	1	0	-6
F1S2:111513	A	20	23	22	30
	B	12	12	14	15
F1S3:111513	A	22	22	24	38
	B	12	8	11	12
F1S4:111513	A	25	18	22	30
	B	11	5	4	4
ab4 sensillum		mineral oil	100% 9-T
ab4: 111413	A	10	117
	B	12	0
	A	8	3
	B	16	5
	A	10	5
	B	12	3
	A	14	104
	B	18	5
	A	6	95
	B	10	3
ab5 sensillum
		minearl oil	1%9-T	10%9-T	100%9-T
ab5: F1S1-3	A	0	2	2	1
	B	2	1	3	2
	A	1	3	2	3
	B	2	2	1	3
	A	1	3	2	1
	B	2	2	1	2
ab5: F1S1-3	A	2	3	2	1
	B	1	3	2	2
	A	2	2	1	1
	B	2	2	1	2
	A	2	0	3	2
	B	3	2	2	3
ab6 sensillum
		minearl oil	1%9-T	10%9-T	100%9-T
ab6: F1S1	A	1	-3	-6	11
120113	B	11	5	23	38
ab6: F2S1	A	8	10	2	18
120113	B	4	5	18	28
ab6: F3S1	A	1	5	14	4
120113	B	4	6	3	20
ab6: F3S2	A	-2	4	4	7
120113	B	7	11	11	23
ab7 sensillum:111513
		minearl oil	1%9-T	10%9-T	100%9-T
ab7: F1S1	A	-2	-3	0	3
	B	12	25	20	26
ab7: F1S2	A	40	41	44	44
	B	1	-2	-3	1
ab7: F1S3	A	36	40	30	36
	B	0	-2	2	1
ab7: F2S1	A	2	3	3	-2
	B	33	38	28	30
ab8 sensillum: using Or43b>10xUAS-IVS-mCD8GFP
		minearl oil	1%9-T	10%9-T	100%9-T
ab8: (5DO)F1S1-3	A	5	3	2	0
	B	18	14	23	30
	A	-2	1	-2	2
	B	13	16	21	30
	A	1	-3	5	6
	B	10	3	7	12
ab8: (5DO)F2S1-3	A	0	1	2	3
	B	18	14	17	9
	A	-3	1	1	2
	B	18	14	16	40
	A	0	-3	2	-3
	B	13	13	15	21
ab9 sensillum:111513
		minearl oil	1%9-T	10%9-T	100%9-T
AC67b15xGFP(ab9)F1S1	A	10	7	14	16
	B	2	4	-2	7
AC67b15xGFP(ab9)F1S2	A	8	7	12	13
	B	2	-2	5	12
AC67b15xGFP(ab9)F1S1	A	6	3	2	12
	B	0	3	0	3
AC67b15xGFP(ab9)F1S1	A	5	3	4	13
	B	-2	0	-2	2
ab10 sensillum:111513
		minearl oil	1%9-T	10%9-T	100%9-T
ab10: F1S1	A	0	1	0	5
	B	0	0	0	0
ab10: F2S1	A	1	3	3	4
	B	1	0	1	1
ab10: F2S2	A	2	1	2	5
	B	1	1	0	-2
ab10: F2S3	A	2	0	6	7
	B	0	1	0	0
maxillary palp sensilla
pb1 sensillum:111613
		minearl oil	1%9-T	10%9-T	100%9-T
pb1: F1S1	A	6	2	5	0
	B	1	1	4	1
pb1: F2S1	A	3	6	0	18
	B	5	-2	2	1
pb1: F3S1	A	2	1	1	2
	B	0	1	2	2
pb2 sensillum:111613
		minearl oil	1%9-T	10%9-T	100%9-T
pb2: F1S1	A	7	1	1	10
	B	8	3	0	0
pb2: F1S2	A	0	2	-4	8
	B	4	2	-3	2
pb2: F2S1	A	4	0	12
	B	8	2	0
pb2: F2S2	A	6	4	6	10
	B	14	4	7	10
pb2: F2S3	A	4	5	9	6
	B	6	5	5	5
pb3 sensillum:111613
		minearl oil	1%9-T	10%9-T	100%9-T
pb3: F1S2	A	3	10	11	9
	B	-1	-3	-4	28
pb3: F1S3	A	13	12	20	26
	B	2	0	-1	10
pb3: F2S1	A	4	7	16	30
	B	1	0	-6	2
pb3: F2S2	A	16	17	19	32
	B	-2	-5	-5	-6
at1	mineral oil	100%9-T
at1: 092913-1	7	9
at1: 092913-2	12	9
at1: 092913-3	7	15
at1: 092913-4	12	9
at1: 092913-5	5	10
at1: 092913-6	10	9
at1: 092913-7	11	14
		minearl oil	1%9T	10%9-T	100%9-T
at4(8DO)F1S1	A	0	0	1	-1
112813	B	2	-1	0	6
	C	1	2	1	0
at4(8DO)F1S2	A	1	1	-2	-1
112813	B	2	-2	-2	-1
	C	2	2	1	1
at4(8DO)F1S1	A	1	-1	0	-1
112813	B	2	1	2	0
	C	1	2	1	2
at4(8DO)F1S1	A	2	0	2	-3
112813	B	2	2	4	1
	C	1	3	2	2
ac3 sensillum:
		minearl oil	1%9-T	10%9-T	100%9-T
AC35a10xGFP(ac3)(8DO)F1S1	A	6	2	2	1
112813	B	3	-1	0	22
AC35a10xGFP(ac3)(8DO)F1S1	A	0	2	4	6
120113	B	6	18	28	44
ai2		mineral oil	100% 9-T
	A	0	5
	B	0	-7
	A	2	-3
	B	1	0
	A	1	2
	B	-2	5
	A	-2	5
	B	-2	6
ai3 sensillum		mineral oil	100% 9-T
11042013	A	2	8
	B	0	4
	C	3	0
	A	3	8
	B	4	7
	C	-2	0
	A	3	0
	B	2	3
	C	1	-2
	A	2	6
	B	1	5
	C	1	-2
Figure 4E
Male: Or7a in ab3A neuron
ab3	minearl oil	9-T0.1%	9-T1%	9-T10%	9-T100%
Dec2113halo22aOr7aM1S1(4DO)(ab3)	6	22	35	52	94
Dec2113halo22aOr7aM2S1(4DO)(ab3)	16	22	42	56	102
Dec2113halo22aOr7aM2S2(4DO)(ab3)	0	9	18	32	78
Dec2113halo22aOr7aM2S3(4DO)(ab3)	20	22	30	46	108
Dec3013halo22aOr7aM1S1(5DO)(ab3)	20	30	42	62	120
Dec3013halo22aOr7aM1S2(5DO)(ab3)	18	23	30	63	100
Dec3013halo22aOr7aM1S3(5DO)(ab3)	20	24	32	54	100
Male: ab4A
ab4	minearl oil	9-T0.1%	9-T1%	9-T10%	9-T100%
Dec2013halo22aOr7aM1S3(4DO)(ab4):A	13	31	36	56	88
Dec2013halo22aOr7aM1S4(4DO)(ab4):A	13	22	35	50	90
Dec2113halo22aOr7aM2S4(4DO)(ab3)	16	26	36	58	96
Dec3013halo22aOr7aM1S4(5DO)(ab4)	18	32	36	53	100
Dec3013halo22aOr7aM1S5(5DO)(ab4)	20	30	38	52	108
Dec3013halo22aOr7aM1S6(5DO)(ab4)	16	26	35	50	108
Female: Or7a in ab3A neuron
ab3	minearl oil	9-T0.1%	9-T1%	9-T10%	9-T100%
Dec2013halo22aOr7aF1S1(4DO)(ab3):A	11	14	22	44	82
Dec2013halo22aOr7aF1S2(4DO)(ab3):A	8	22	34	52	93
Dec2113halo22aOr7aF1S1(4DO)(ab3):A	12	30	41	53	87
Dec2113halo22aOr7aF1S2(4DO)(ab3):A	21	40	47	61	115
Dec2613halo22aOr7aF1S4(3DO)(ab3):A	4	6	13	38	72
Dec2613halo22aOr7aF2S5(3DO)(ab3):A	15	26	32	40	90
Female: ab4A
ab4	minearl oil	9-T0.1%	9-T1%	9-T10%	9-T100%
Dec2113halo22aOr7aF1S5(4DO)(ab4):A	15	30	43	58	94
Dec2113halo22aOr7aF1S6(4DO)(ab4):A	23	36	38	50	102
Dec2313halo22aOr7aF2S1(4DO)(ab4):A	21	28	32	56	108
Dec2313halo22aOr7aF2S2(4DO)(ab4):A	14	26	32	57	88
Dec2313halo22aOr7aF4S1(4DO)(ab4):A	15	24	34	65	99
Dec2313halo22aOr7aF4S2(4DO)(ab4):A	20	32	42	58	105
Dec2613halo22aOr7aF1S1(3DO)(ab4):A	18	23	35	54	93
Dec2613halo22aOr7aF1S1(3DO)(ab4):A	19	27	37	49	84
