# Supplementary material for: Food odors trigger Drosophila males to deposit a pheromone that guides aggregation and female oviposition decisions
Source: eLife. 2015 Sep 30;4:e08688. doi: 10.7554/eLife.08688 (PMC4621432; doi:10.7554/eLife.08688)
Supplement: Figure 5—source data 1. — DOI: http://dx.doi.org/10.7554/eLife.08688.034 [file elife08688s005.xlsx]

## Sheet: Sheet1
Figure 5-Source data
	Figure 5C
	WT as secretor and WT as detector	WT as secretor and UAS-hid as detector	WT as secretor and Or7a>hid as detector	WT as secretor and Or83c>hid as detector	WT as secretor and Or43a>hid as detector
	0.43	0.4071	0.0359	0.3707	0.511
	0.25	0.2714	0.0705	0.3002	0.5501
	0.42	0.3047	-0.0217	0.3135	0.3253
	0.28		-0.1116	0.3129	0.3734
Average	0.345	0.328	-0.006725	0.324325	0.43995
SD	0.0932738	0.0707	0.0795898	0.0315191	0.107633
SE	0.0466369	0.0408	0.0397949	0.0157596	0.0538165
	Figure 5E
	WT	Or7a>hid	Or7a-
	0.3779	-0.1744	0.1511
	0.6576	-0.166	0.1831
	0.4138	-0.0486	0.0226
	0.4185	-0.0018	-0.08
			0.1396
Average	0.46695	-0.0977	0.08328
SD	0.128387	0.0859368	0.109633
SE	0.0641935	0.0429684	0.049031
