# Supplementary material for: Food odors trigger Drosophila males to deposit a pheromone that guides aggregation and female oviposition decisions
Source: eLife. 2015 Sep 30;4:e08688. doi: 10.7554/eLife.08688 (PMC4621432; doi:10.7554/eLife.08688)
Supplement: Figure 6—source data 1. — DOI: http://dx.doi.org/10.7554/eLife.08688.039 [file elife08688s006.xlsx]

## Sheet: Sheet1
Figure 6-Source data
Figure 6A
female	quadrant 1(odor qua)	quadrant2	quadrant3	quadrant4
22	150	54	86	82
18	130	26	89	60
19	106	48	54	86
24	135	110	50	80
23	57	280	26	78
17	81	28	74	57
21	88	120	121	31
18	28	128	69	67
22	246	93	51	47
22	54	21	23	269
Figure 6A'
female	quadrant 1(odor qua)	quadrant2	quadrant3	quadrant4
30	273	35	61	60
20	286	29	8	17
23	185	122	37	38
20	247	22	36	43
18	112	152	8	11
20	420	22	5	7
17	206	10	12	9
21	91.5	53.5	48.5	49.5
18	195	47	50	51
Figure 6B
female	quadrant 1(odor qua)	quadrant2	quadrant3	quadrant4
18	18	33	42	145
20	95	67	47	46
17	90	59	50	60
19	21	146	28	49
14	40	42	57	51
17	102	128	140	36
16	29	26	130	80
19	128	28	32	37
16	30	61	43	110
14	20	92	45	25
21	100	59	63	97
Figure 6B'
female	quadrant 1(odor qua)	quadrant2	quadrant3	quadrant4
26	196	36	28	150
26	250	42	12	22
21	204	10	8	48
23	290	16	12	14
22	270	8	16	21
18	184	38	33	25
20	196	8	4	5
22	184	35	12	24
21	145	16	97	17
Figure 6C
female	quadrant 1(odor qua)	quadrant2	quadrant3	quadrant4
24	167.5	47.5	43.5	55.5
17	100	30	18	20
19	178	7	3	7
20	285.5	15.5	13.5	43.5
18	258	14	8	13
15	65	70	8	18
15	186	56	9	38
12	96	26	20	32
18	158	139	20	12
Figure 6C'
female	quadrant 1(odor qua)	quadrant2	quadrant3	quadrant4
14	76.5	75.5	110.5	116.5
14	15.5	128.5	104.5	20.5
14	111	21	32	18
9	47.25	45.25	51.25	40.25
14	14	16	142	46
18	72	211	164	62
17	24	8	18	200
18	62	10	40	350
19	78	72	102	153
Figure 6D
female	quadrant 1(odor qua)	quadrant2	quadrant3	quadrant4
18	272	56	43	4
13	4	135	30	30
19	200	22	23	40
16	30	49	230	92
18	14	254	16	68
20	185	10	276	22
19	80	83	158	82
16	16	284	5	98
16	12	52	228	145
Figure 6F
female	quadrant 1(odor qua)	quadrant2	quadrant3	quadrant4
19	53	42	210	127
19	178	180	96	58
18	132	86	89	90
18	189	74	24	54
16	92	62	80	150
16	150	40	40	30
16	16	98	250	15
16	10	82	250	18
