# Supplementary material for: Food odors trigger Drosophila males to deposit a pheromone that guides aggregation and female oviposition decisions
Source: eLife. 2015 Sep 30;4:e08688. doi: 10.7554/eLife.08688 (PMC4621432; doi:10.7554/eLife.08688)
Supplement: Figure 7—source data 1. — DOI: http://dx.doi.org/10.7554/eLife.08688.043 [file elife08688s007.xlsx]

## Sheet: Sheet1
Figure 7-Source data
Figure 7A (left)
female	quadrant 1	quadrant2	quadrant3		normalized Q1	Normalized Q2	Normalized Q3
10	64	16	19		6.4	1.6	1.9
11	62	46	68		5.63636	4.18182	6.18182
13	52	130	18		4	10	1.38462
14	68	82	18		4.85714	5.85714	1.28571
12	10	62	74		0.833333	5.16667	6.16667
12	10	82	72		0.833333	6.83333	6
9	20	21	9		2.22222	2.33333	1
10	42	43	52		4.2	4.3	5.2
10	9	42	60		0.9	4.2	6
8	44	29	8		5.5	3.625	1
9	74	27	13		8.22222	3	1.44444
12	20	70	68		1.66667	5.83333	5.66667
13	100	38	24		7.69231	2.92308	1.84615
14	22	77	110		1.57143	5.5	7.85714
15	22	70	22		1.46667	4.66667	1.46667
13	20	95	18		1.53846	7.30769	1.38462
13	120	56	136		9.23077	4.30769	10.4615
Figure 7A (right)
13	3	146	24		0.230769	11.2308	1.84615
13	7	160	4		0.538462	12.3077	0.307692
12	5	180	7		0.416667	15	0.583333
14	23	154	17		1.64286	11	1.21429
14	8	180	7		0.571429	12.8571	0.5
14	6	196	17		0.428571	14	1.21429
17	14	159	9		0.823529	9.35294	0.529412
13	43	178	18		3.30769	13.6923	1.38462
14	26	118	22		1.85714	8.42857	1.57143
14	32	60	18		2.28571	4.28571	1.28571
12	15	93	16		1.25	7.75	1.33333
14	52	198	54		3.71429	14.1429	3.85714
Figure 7B
female	quadrant 1	quadrant2	quadrant3		normalized Q1	Normalized Q2	Normalized Q3
10	98	13	14		9.8	1.3	1.4
11	56	8	100		5.09091	0.727273	9.09091
12	96	28	18		8	2.33333	1.5
11	19	16	100		1.72727	1.45455	9.09091
9	48	35	92		5.33333	3.88889	10.2222
10	68	76	29		6.8	7.6	2.9
9.5	28	148	54		2.94737	15.5789	5.68421
12	180	94	74		15	7.83333	6.16667
12	79	94	58		6.58333	7.83333	4.83333
10	46	43	116		4.6	4.3	11.6
10	31	56	134		3.1	5.6	13.4
10	72	94	58		7.2	9.4	5.8
10	128	114	30		12.8	11.4	3
12	120	82	24		10	6.83333	2
10	32	24	152		3.2	2.4	15.2
Figure 7C
female	quadrant 1	quadrant2	quadrant3		normalized Q1	Normalized Q2	Normalized Q3
9	5	72	5		0.555556	8	0.555556
8	6	42	26		0.75	5.25	3.25
11	16	80	18		1.45455	7.27273	1.63636
12	22	66	28		1.83333	5.5	2.33333
12	10	45	15		0.833333	3.75	1.25
12	12	49	14		1	4.08333	1.16667
8	12	37	20		1.5	4.625	2.5
12	58	50	82		4.83333	4.16667	6.83333
10	28	134	20		2.8	13.4	2
10	56	88	6		5.6	8.8	0.6
Figure 7D
female	quadrant 1	quadrant2	quadrant3		normalized Q1	Normalized Q2	Normalized Q3
11	88	62	44		8	5.63636	4
12	62	22	109		5.16667	1.83333	9.08333
10	50	60	67		5	6	6.7
9	28	52	48		3.11111	5.77778	5.33333
10	60	34	31		6	3.4	3.1
9	30	120	28		3.33333	13.3333	3.11111
8	140	3	108		17.5	0.375	13.5
13	98	92	120		7.53846	7.07692	9.23077
8	32	121	8		4	15.125	1
9	12	139	6		1.33333	15.4444	0.666667
Figure 7E
	WT to 10-6 E2-hexenal	WT to 10-5 E2-hexenal	Or7a- to 10-5 E2-hexenal
	0.0475	0.3827	-0.0416
	0.1107	0.3164	-0.0965
	0.0714	0.3315	0.2422
	0.0064		-0.1823
			0.1098
	0.059	0.343533	0.00632
	0.043687	0.0347494	0.169406
	0.0218435	0.0200632	0.0757629
